# Supplementary material
Source: PubMed Central journal article supplement (PMC5767138)

# Supplemental Figure 1

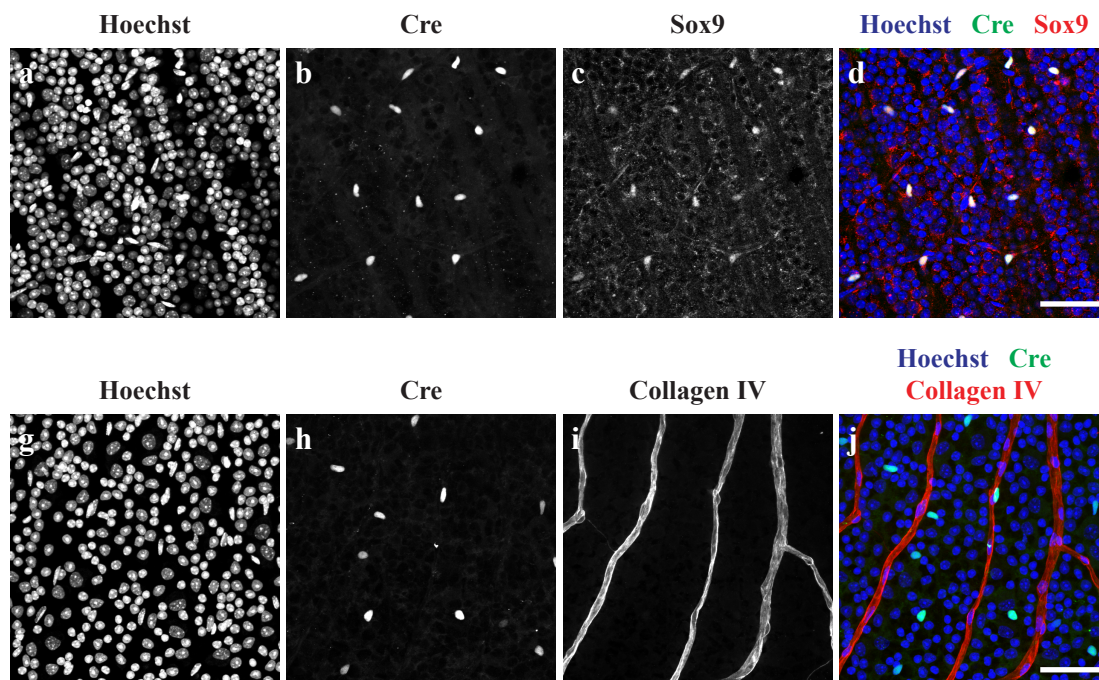

# Supplemental Figure 2

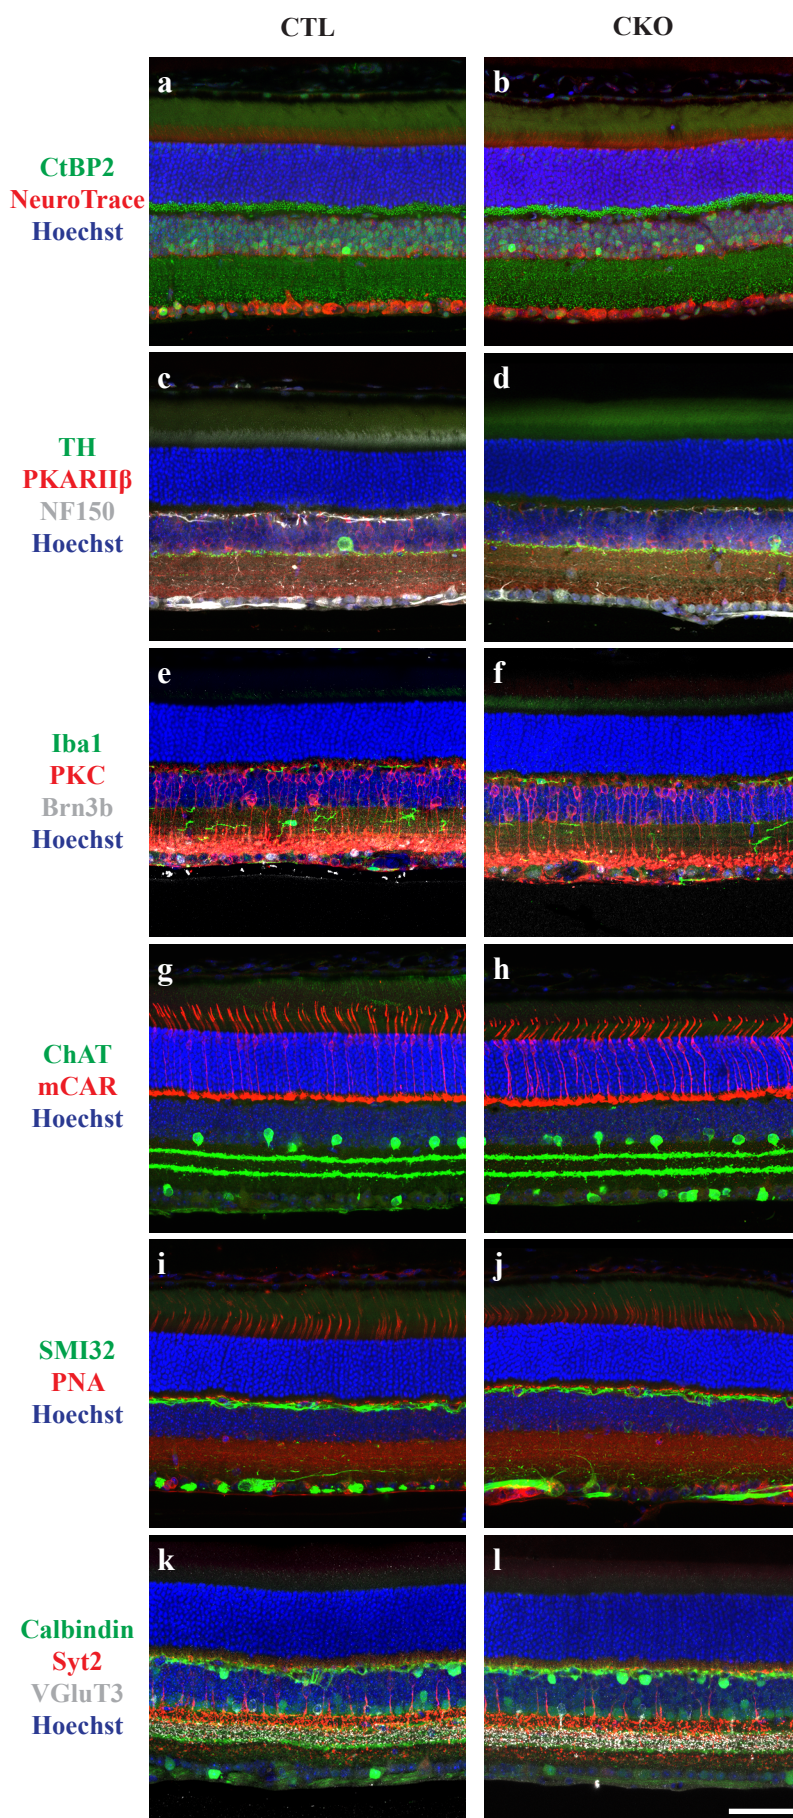



# Supplemental Figure 3

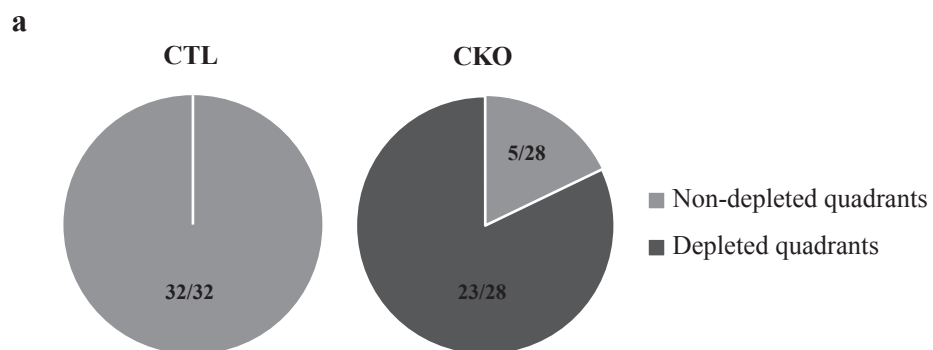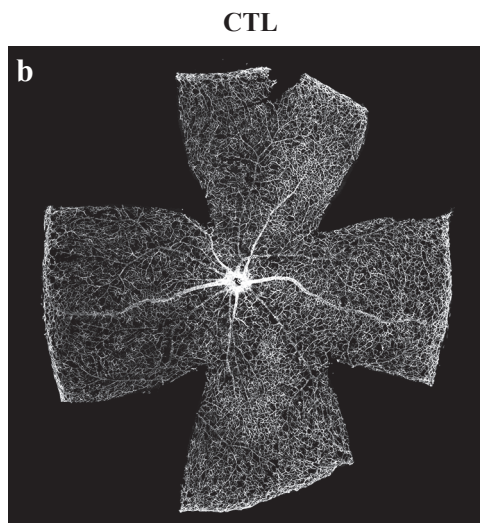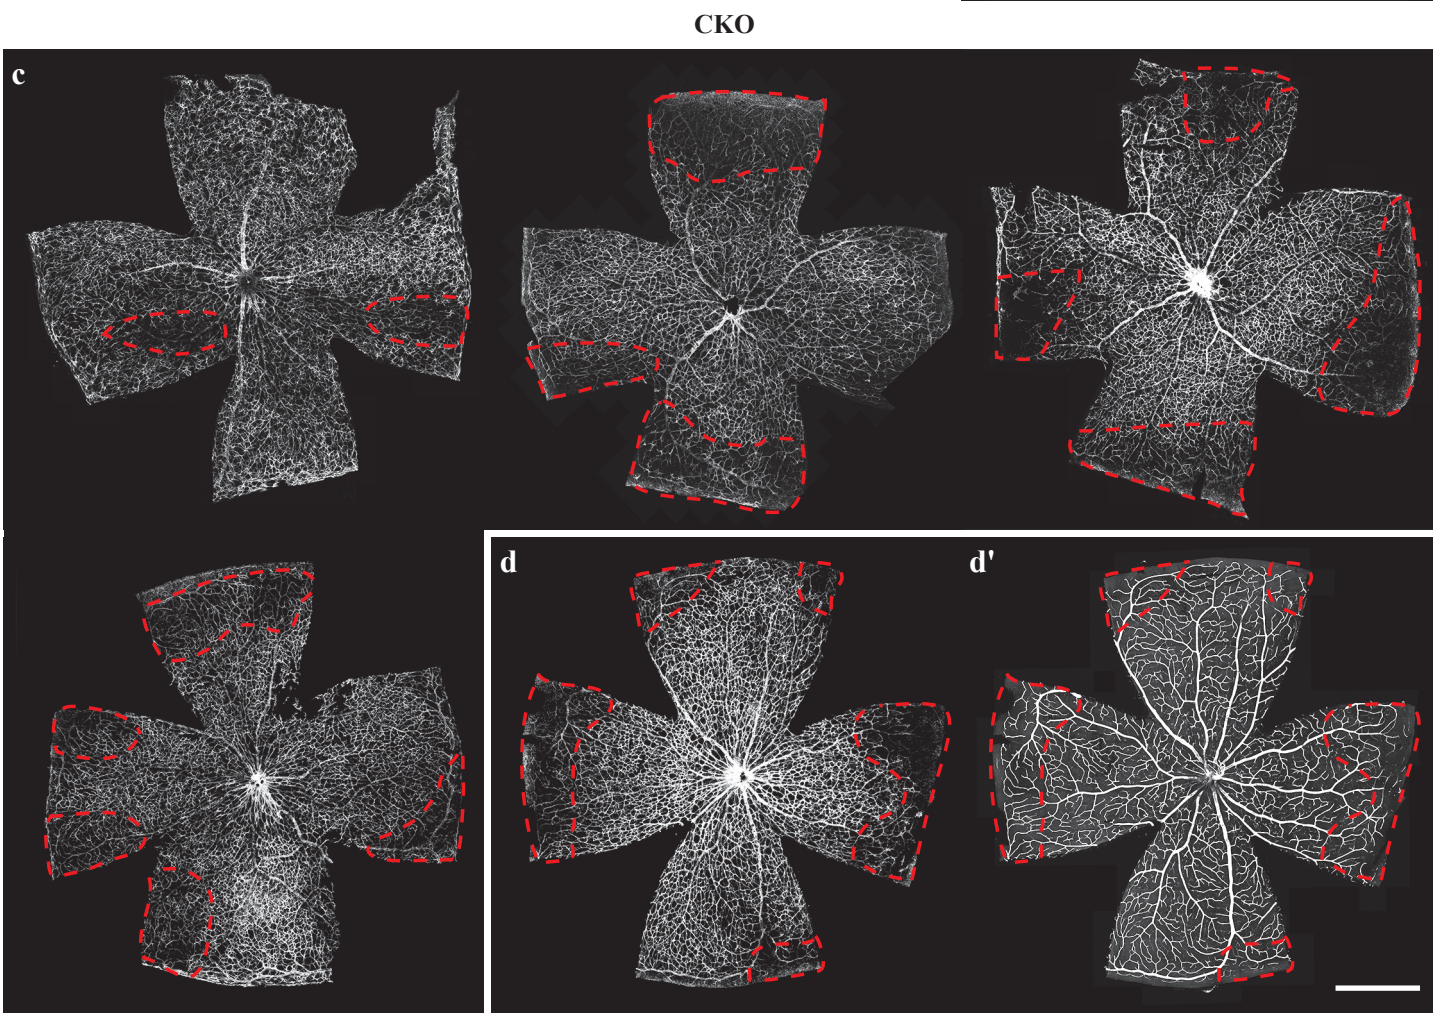

# Supplemental Figure 4

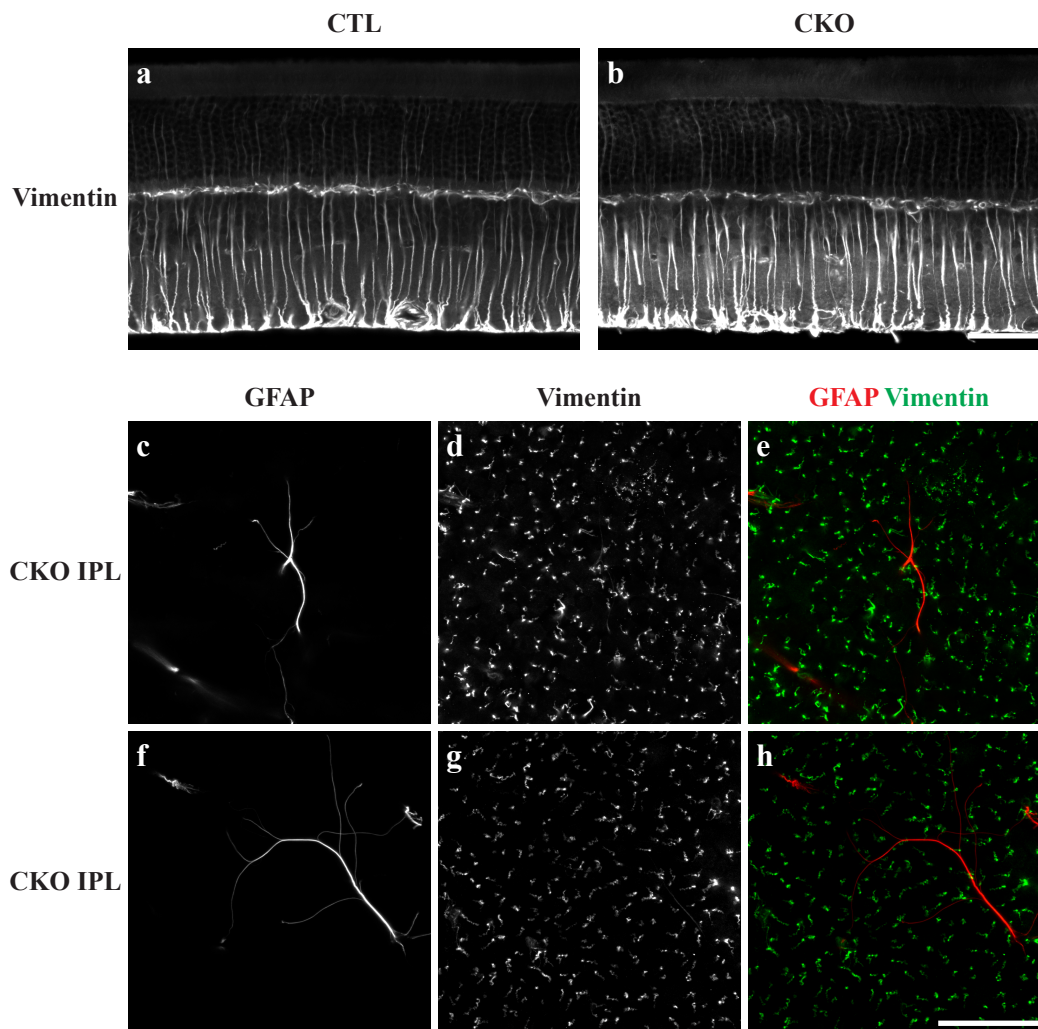



# Supplemental Figure 5

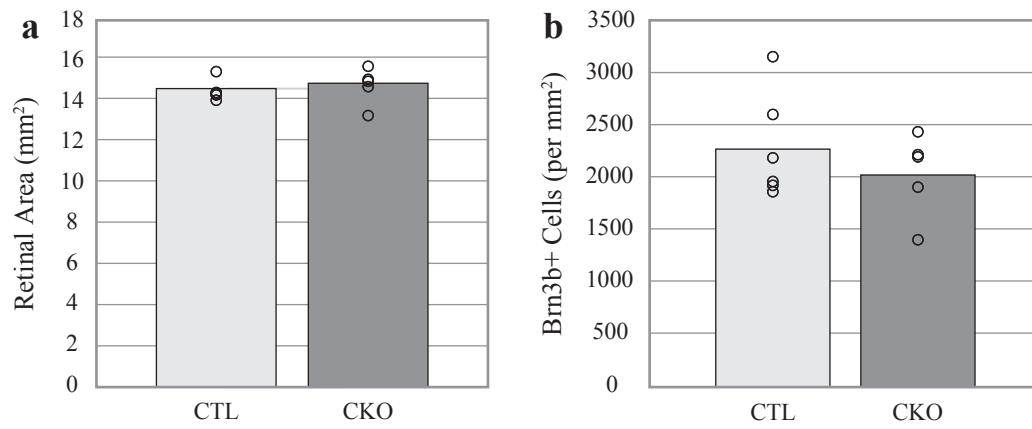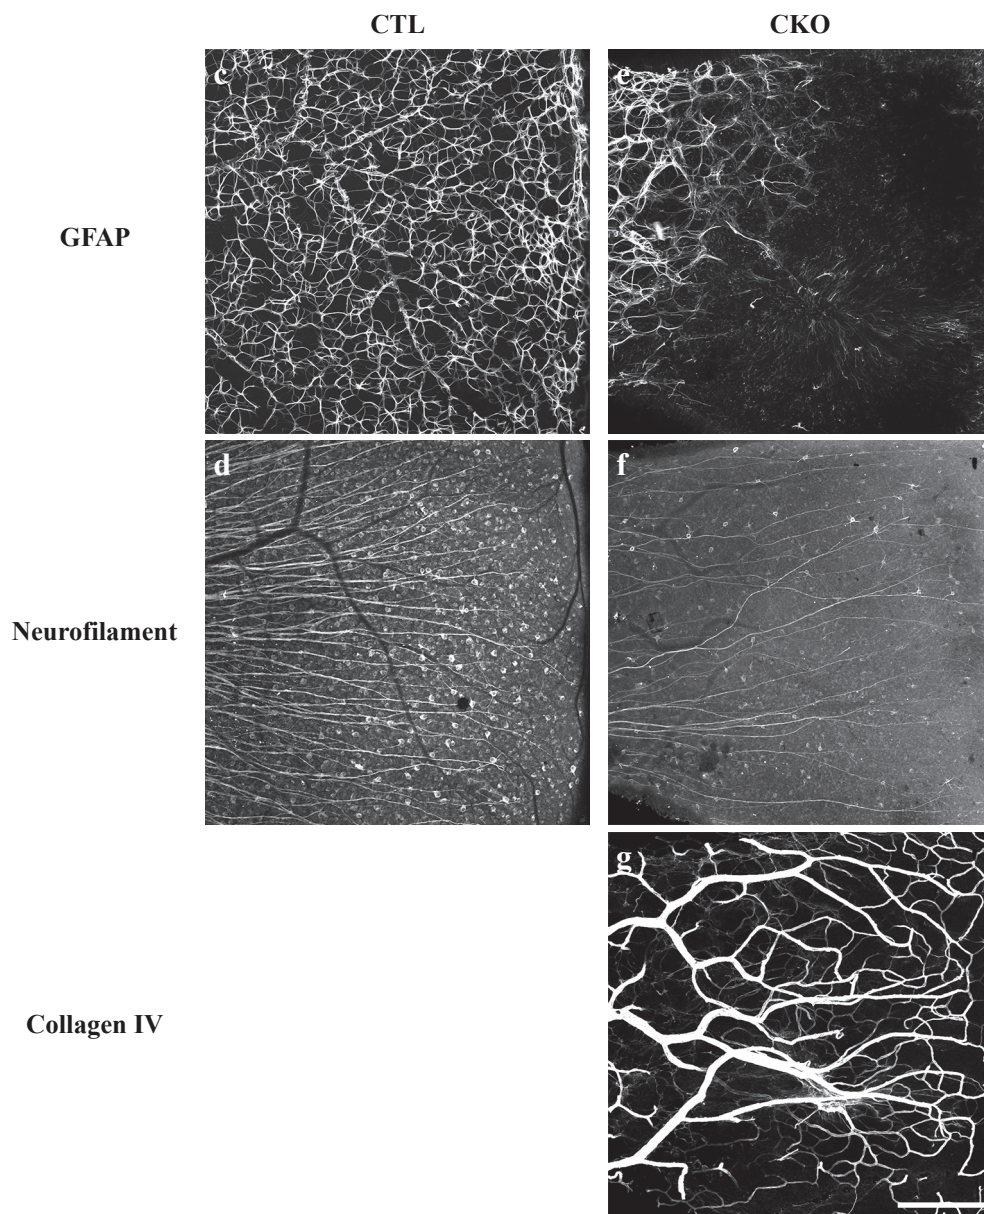

# Supplemental Figure 6

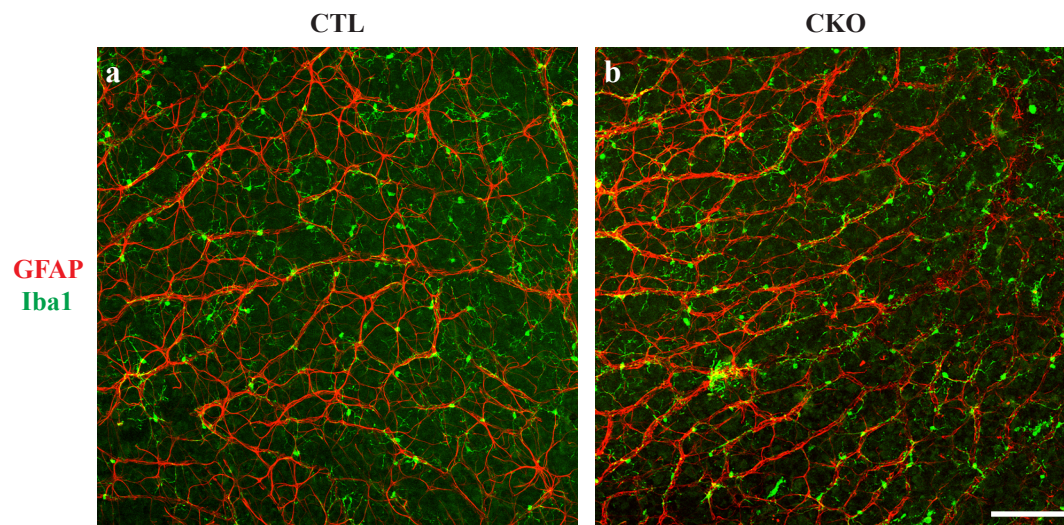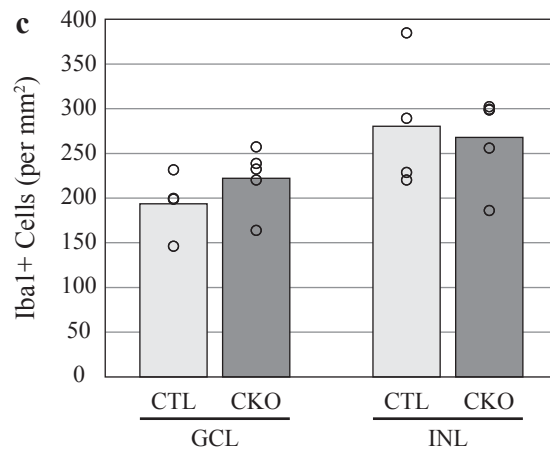



# Supplemental Figure 7

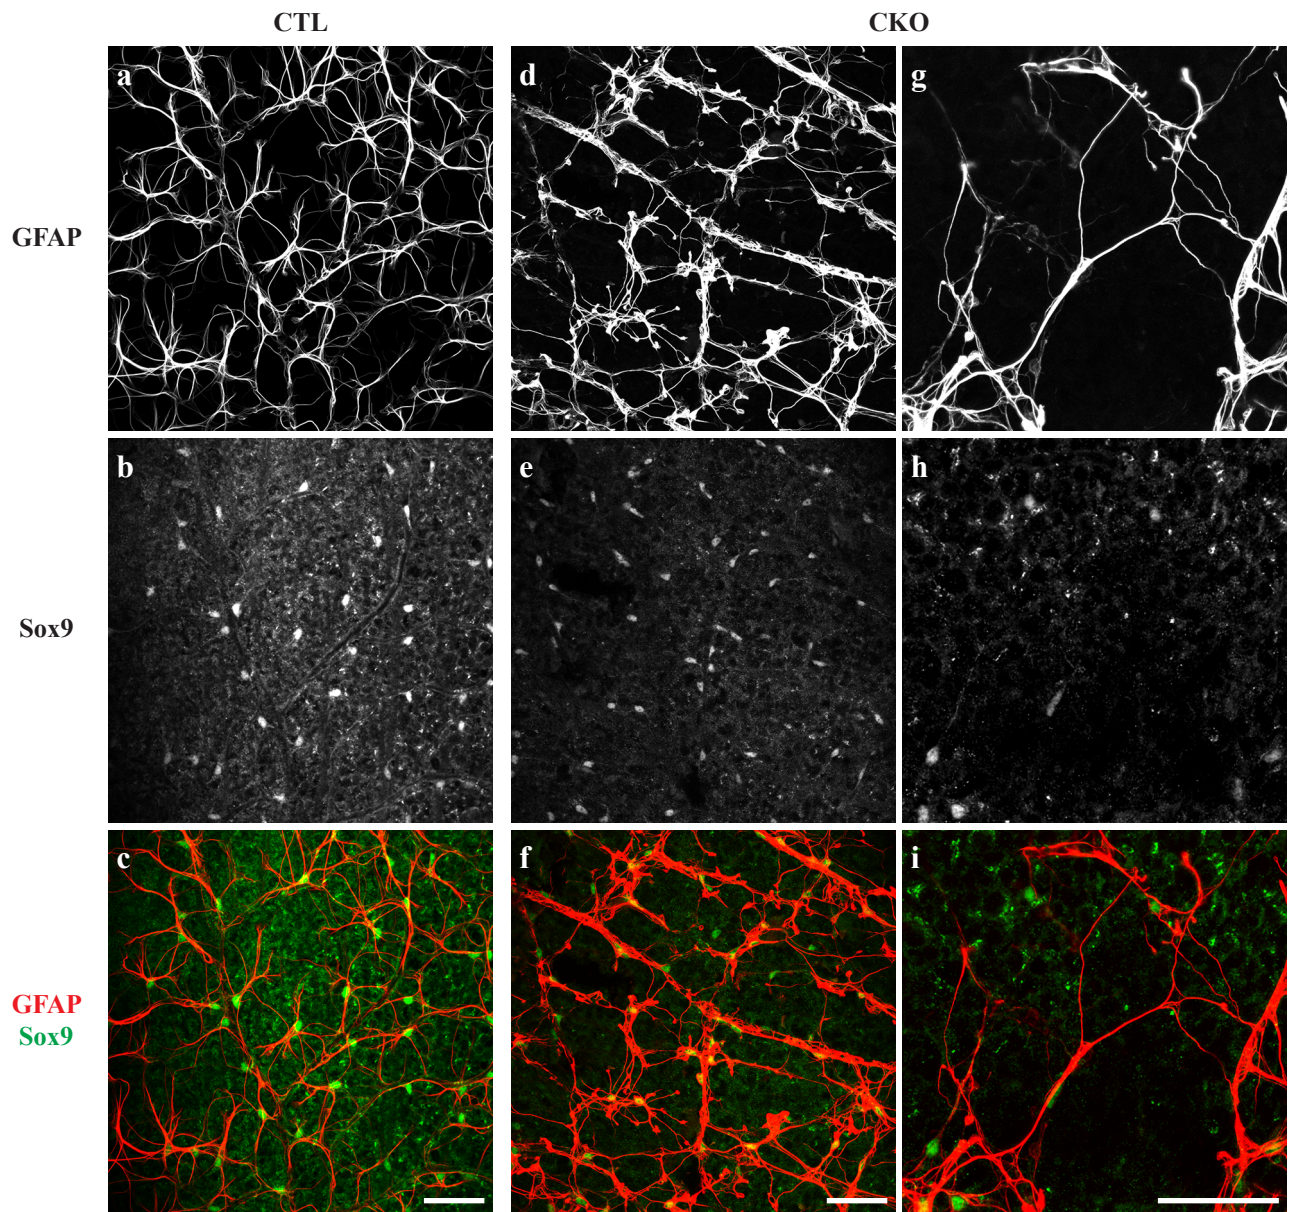

Supplement: NIHMS921416-supplement-Supplemental_figures.pdf [file NIHMS921416-supplement-Supplemental_figures.pdf]
